# Supplementary material
Source: MDPI journal article supplement (https://www.mdpi.com/search?q=molecules-24-03743)
Supplement: s001 [file molecules-24-03743-s001.pdf]

### Supplementary Information

**Table 1.** Primer sequences used for detection of genes related to anthocyanin biosynthesis by qRT-PCR.

| Gene           | Forward primer sequence (5'-3') | Reverse primer sequence (5'-3') |
|----------------|---------------------------------|---------------------------------|
| <i>PAL</i>     | CATGGCGTCTATGGTTCTGT            | TAAACTCCGGCTTCCCATT             |
| <i>4CL</i>     | AACCAACCCGGAGAGATTTG            | CAGCCATCCACGTCAATAGT            |
| <i>C4H</i>     | GTGGAGGAGGTGAAGAAGAATC          | ACCTCCGGTCAAACATAATCC           |
| <i>CHS</i>     | GGGCTCACGTTCCATTTACT            | GGAAATGCCGAGAGGATTGA            |
| <i>CHI</i>     | TTGAGAAGCTGACACGGATAAC          | TCTGCATCGCCATACATTCC            |
| <i>DFR1</i>    | GCATGGAAAGCAGCCAAAG             | CTGAGTGGGAATGTTGGTATGA          |
| <i>DFR2</i>    | GAAGCATGGAAAGCAGCTAAAG          | ACTGGTGAGAGTGCATAATG            |
| <i>DFR3</i>    | CATAGTGGAGGCAGGAAAGAAG          | AGCAGAGATGGAGGAGGTAAA           |
| <i>DFR4</i>    | CTGCTGGAGTGATCTGGATTT           | GTTGCTTTCCATGCTTCCTTC           |
| <i>F3H1</i>    | GTGACCATGGCCATCTCATT            | GACCTTGTTGATCTCCTTCTC           |
| <i>F3H2</i>    | GGGTGTCTATAGCGACGTTTC           | CGTGATGGGCTCTCCATAAT            |
| <i>F3'H</i>    | GGCGTTTCGCAGAACTATTA            | GGATTCTGTGACTAGCCGATTT          |
| <i>ANS</i>     | ACATAGCTGCAACAAGGGAATA          | TCCAGCCTTCCTTCTCTAA             |
| <i>UFGT1</i>   | TTCCGCCTCGCCAATAAA              | TGAGGTGTGGGTGAAGATTG            |
| <i>UFGT2</i>   | CGACTCCCGTCAACCTTTATTC          | TCTGGTAGTGAGGAGGAAGATG          |
| <i>UFGT3</i>   | GCCGGAGCTTGCTCTATTT             | CCGATCGATACTTCTGACATTCC         |
| <i>UFGT4</i>   | CGATTCTGGAGGCGATATCTTT          | TCCATACACTCTCCACAAATC           |
| <i>3AT1-1</i>  | GGCGACGGGAGTAGTATATTTG          | CGGAAAGTGAGAGGGGATGAAG          |
| <i>3AT1-2</i>  | CGGCGGATAATGAACGGATAA           | GGTGATGAGTGGTGCCAATA            |
| <i>3AT1-3</i>  | GTGGACTGCGCTTTCTATACTC          | AGTCTTCAATGGCGGTTCTATC          |
| <i>3AT1-4</i>  | GTTACCGCCTCATCTTCTATC           | GTGTTGAAGGGTGAGGGATAAT          |
| <i>3AT1-5</i>  | CAGTTCACCGCCTCATCTT             | GGCGAAGGGTGAGAGATAAAG           |
| <i>3AT1-6</i>  | GGCCTGGGAATTCTTCTCTAAT          | GATTCCAGTCCTTTCGGATCTC          |
| <i>3AT1-7</i>  | CACCGCCTCATCTTCTATCAA           | GAGGGTAGTGTTGAAGGGTAAG          |
| <i>3AT2</i>    | CCCTCACTCTAACTCGCATTTTC         | CGGCGAGAGGGAAATAATACTG          |
| <i>MYB1</i>    | GTGCTTAGGTGGTCGCTTAT            | CATGGCAGACACCTTCTTCT            |
| <i>MYB60</i>   | GCGATCTGTTCCCACTAACA            | GGGTAGCTCAAGTGGTAAGTAAG         |
| <i>MYB75-1</i> | CAGCCGCTTCATCCGATAAT            | GTCAATGGCGTCCGAGATAAT           |
| <i>MYB75-2</i> | GCATGGTCGGAAGAAGAAGA            | CACCTATTCAACCCAGCTCTAA          |
| <i>MYB113</i>  | CAACCTCCGATGAAGGAGATAAG         | ACTGAATTCTCCCTCTCAATAAA         |
| <i>ACT</i>     | CTTTGCCAAGAAGGAGATGC            | TCTTGTCTGACCACCAACA             |

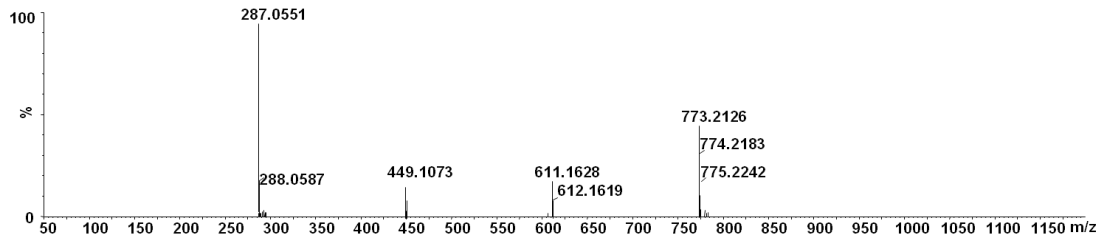

1

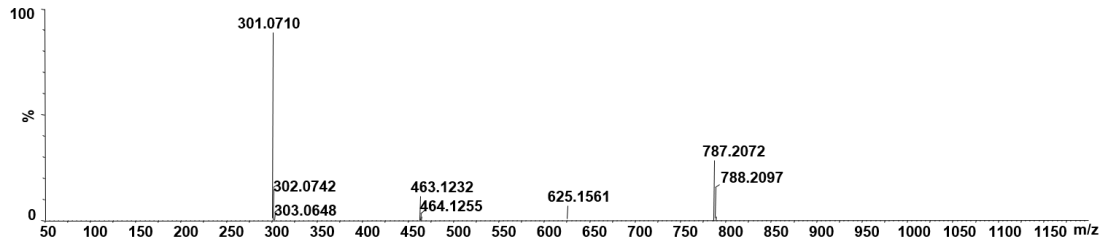

2

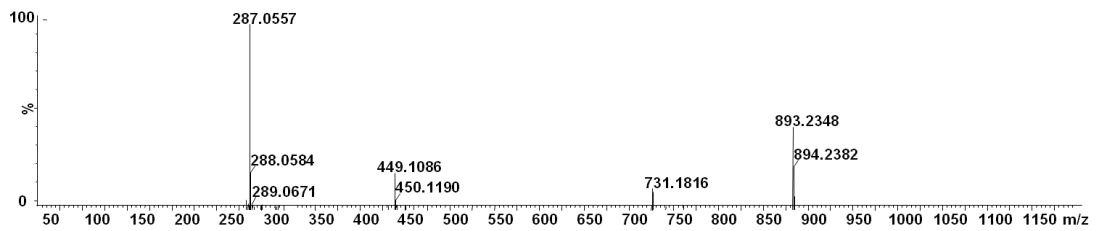

3

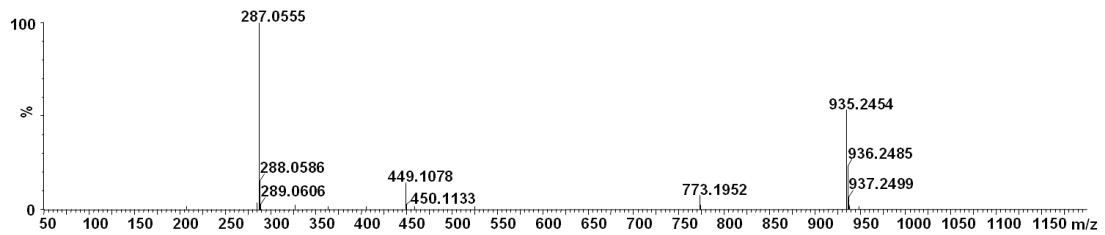

4

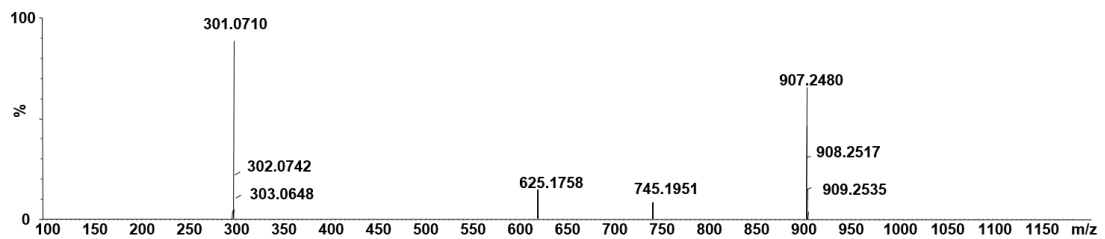

5

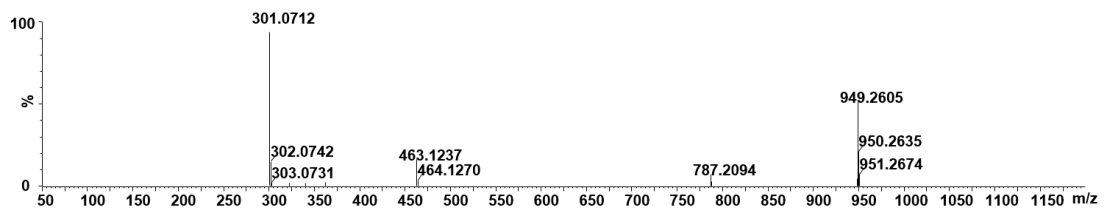

6

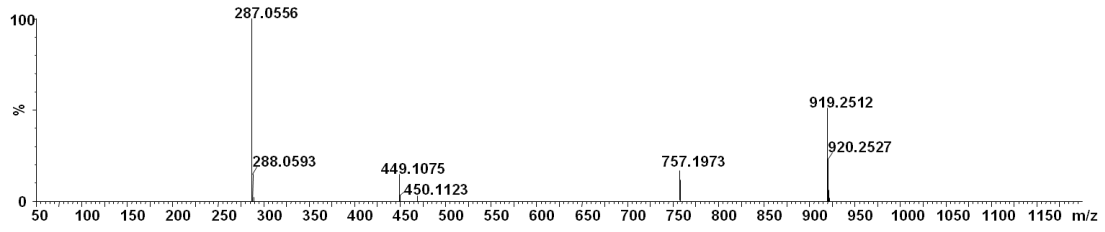

7

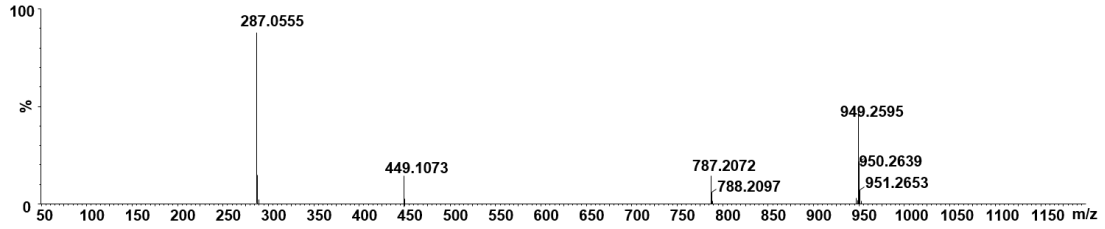

8

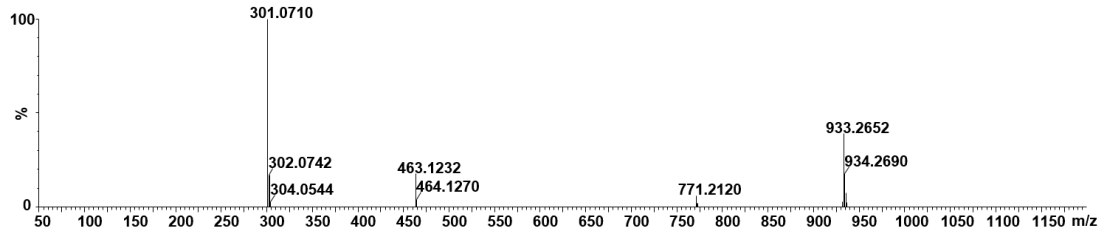

9

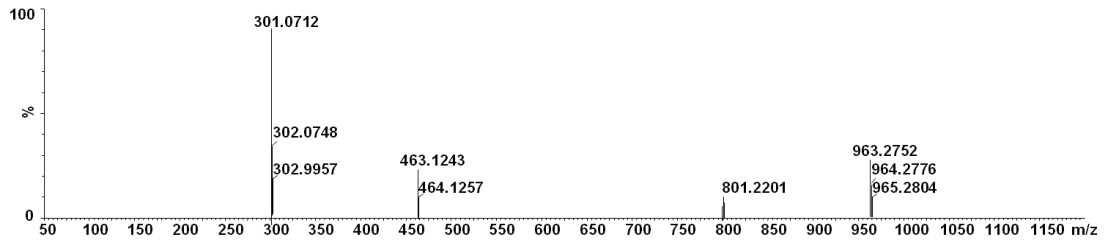

10

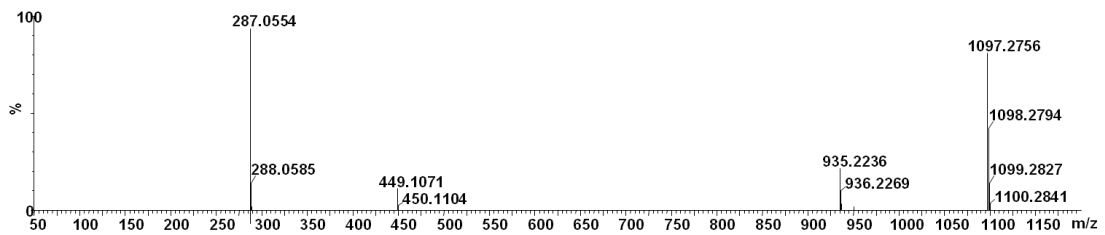

11a

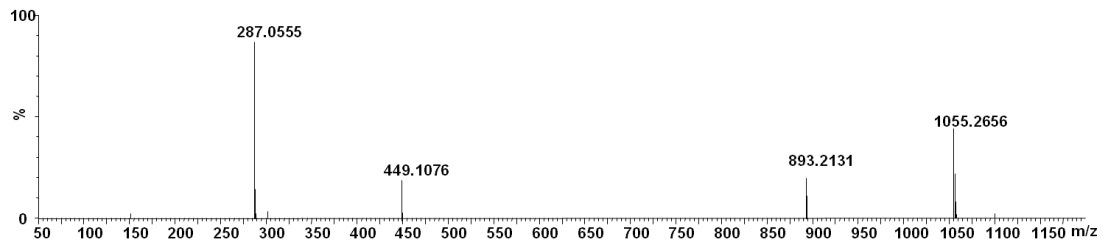

11b

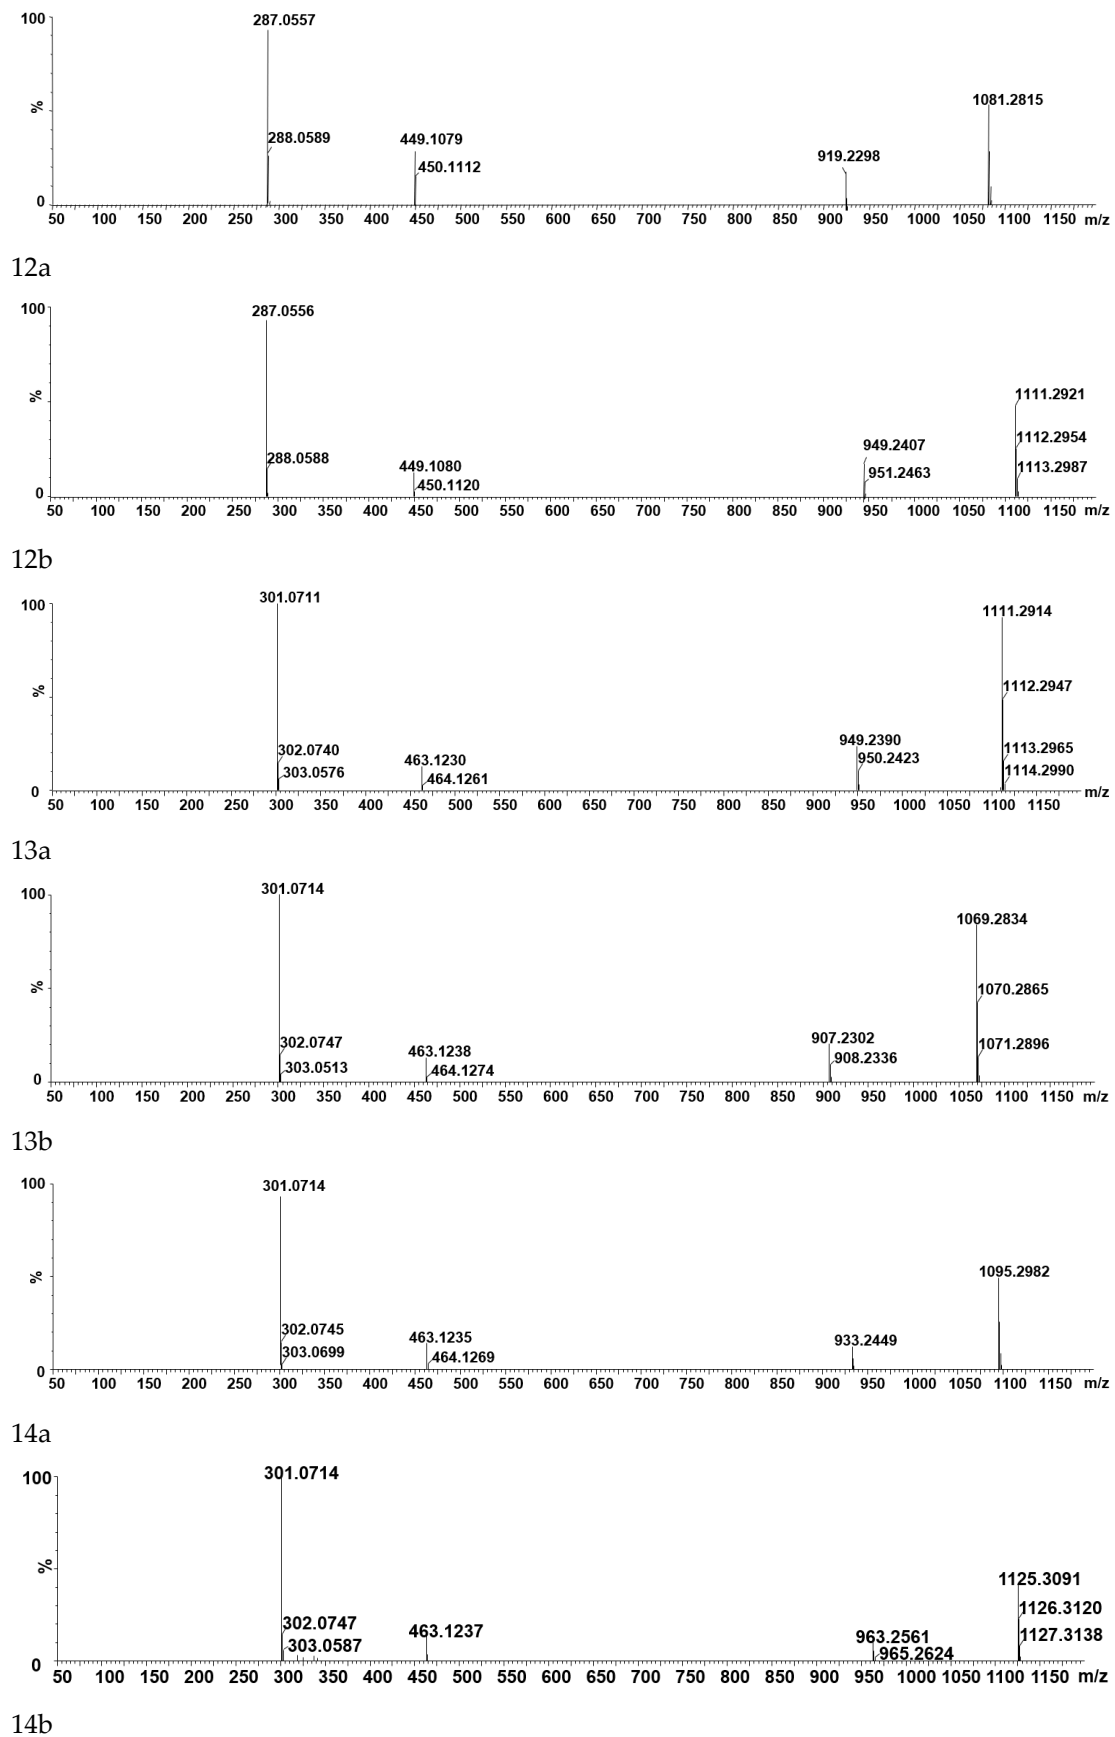

**Figure 1.** UPLC-QTOF-MS/MS of anthocyanins in two purple sweetpotato leaves. Precursor analysis of (1) Cyanidin 3-sophoroside-5-glucoside; (2) Peonidin 3-sophoroside-5-glucoside; (3) Cyanidin

3-(6''-p-hydroxybenzoylsoph)-5-glucoside; (4) Cyanidin 3-(6''-caffeylsophoroside)-5-glucoside; (5)  
 Peonidin 3-(6''-p-hydroxybenzoylsophoroside)-5-glucoside; (6) Peonidin  
 3-(6''-caffeylsophoroside)-5-glucoside; (7) Cyanidin 3-(6''-p-coumarylsophoroside)-5-glucoside; (8)  
 Cyanidin 3-(6''-feruloylsophoroside)-5-glucoside; (9) Peonidin  
 3-(6''-p-coumarylsophoroside)-5-glucoside; (10) Peonidin 3-(6''-feruloylsophoroside)-5-glucoside; (11a)  
 Cyanidin 3-(6',6''-dicaffeylsophoroside)-5-glucoside; (11b) Cyanidin  
 3-(6'-caffeoyl-6''-p-hydroxybenzoylsophoroside)-5-glucoside; (12a) Cyanidin  
 3-(6'-caffeoyl-6''-feruloylsophoroside)-5-glucoside; (12b) Cyanidin 3-(6'-caffeoyl-6''-p-coumaryl  
 sophoroside)-5-glucoside; (13a) Peonidin 3-(6',6''-dicaffeylsophoroside)-5-glucoside; (13b) Peonidin  
 3-(6'-caffeoyl-6''-p-hydroxybenzoylsophoroside)-5-glucoside; (14a) Peonidin  
 3-(6'-caffeoyl-6''-p-coumarylsophoroside)-5-glucoside; (14b) Peonidin  
 3-(6'-caffeoyl-6''-feruloylsophoroside)-5-glucoside.
